# Supplementary material for: Smart multimedia learning of ICT: role and impact on language learners’ writing fluency— YouTube online English learning resources as an example
Source: Springer Nature journal article supplement (doi:10.1186/s40561-020-00134-7), 2020-09-15
Supplement: MOESM1 [file 18383212]

Appendix A. (Questions 4-29)

Questions 4-10 related to Online Learning Engagement Rate

Q.4 Rate the extent to which reading books online (Mono-medium: text/ speech) made or did not make learning and improving English writing interesting.

1. Not interesting
2. Fairly interesting
3. Interesting
4. Very interesting
5. Extremely interesting

Q.5 Rate the extent to which listening to songs online (Mono-medium: text/ speech) made or did not make learning and improving English writing interesting.

1. Not interesting
2. Fairly interesting
3. Interesting
4. Very interesting
5. Extremely interesting

Q.6 Rate the extent to which watching YouTube BBC 6-Minute English online (Multimedia: text & speech) made or did not make learning and improving English writing interesting.

1. Not interesting
2. Fairly interesting
3. Interesting
4. Very interesting
5. Extremely interesting

Q.7 Rate the extent to which Video games online (Multimedia: text & speech) made or did not make learning and improving English writing interesting.

1. Not interesting
2. Fairly interesting
3. Interesting
4. Very interesting
5. Extremely interesting

Q.8 Rate the extent to which watching songs online (Multimedia: text & speech) made or did not make learning and improving English writing interesting.

1. Not interesting
2. Fairly interesting
3. Interesting
4. Very interesting
5. Extremely interesting

Q.9 Rate the extent to which watching films online (Multimedia: text & speech) made or did not make learning and improving English writing interesting.

1. Not interesting
2. Fairly interesting
3. Interesting
4. Very interesting
5. Extremely interesting

Q.10 Rate the extent to which reading audio books online (Multimedia: text & speech) made or did not make learning and improving English writing interesting.

1. Not interesting
2. Fairly interesting
3. Interesting

4. Very interesting
5. Extremely interesting

Questions 11 - 17 related to Online Learning Time Range of Exposure

Q.11 How much time did you spend on reading books online (Mono-medium: text/ speech) per day for learning and improving English writing?

1. 0 hour
2. 1 hour
3. 2 hours
4. 3 hours
5. + 3 hours

Q.12 How much time did you spend on listening to songs online (Mono-medium: text/ speech) per day for learning and improving English writing?

1. 0 hour
2. 1 hour
3. 2 hours
4. 3 hours
5. + 3 hours

Q.13 How much time did you spend on watching YouTube BBC 6-Minute English online (Multimedia: text & speech) per day for learning and improving English writing?

1. 0 hour
2. 1 hour
3. 2 hours
4. 3 hours
5. + 3 hours

Q.14 How much time did you spend on Video games online (Multimedia: text & speech) per day for learning and improving English writing?

1. 0 hour
2. 1 hour
3. 2 hours
4. 3 hours
5. + 3 hours

Q.15 How much time did you spend on watching songs online (Multimedia: text & speech) per day for learning and improving English writing?

1. 0 hour
2. 1 hour
3. 2 hours
4. 3 hours
5. + 3 hours

Q.16 How much time did you spend on watching films online (Multimedia: text & speech) per day for learning and improving English writing?

1. 0 hour
2. 1 hour
3. 2 hours
4. 3 hours
5. + 3 hours

Q.17 How much time did you spend on reading audio books online (Multimedia: text & speech) per day for

learning and improving English writing?

1. 0 hour
2. 1 hour
3. 2 hours
4. 3 hours
5. + 3 hours

Questions 18 - 23 related to Offline Learning Engagement Rate

Q.18 Rate the extent to which reading books offline (Mono-medium: text/ speech) made or did not make learning and improving English writing interesting.

1. Not interesting
2. Fairly interesting
3. Interesting
4. Very interesting
5. Extremely interesting

Q.19 Rate the extent to which listening to songs offline (Mono-medium: text/ speech) made or did not make learning and improving English interesting.

1. Not interesting
2. Fairly interesting
3. Interesting
4. Very interesting
5. Extremely interesting

Q.20 Rate the extent to which Video games offline (Mono-medium: text/ speech) made or did not make learning and improving English writing interesting.

1. Not interesting
2. Fairly interesting
3. Interesting
4. Very interesting
5. Extremely interesting

Q.21 Rate the extent to which formal schooling offline (Multimedia: text & speech) made or did not make learning and improving English writing interesting.

1. Not interesting
2. Fairly interesting
3. Interesting
4. Very interesting
5. Extremely interesting

Q.22 Rate the extent to which watching films offline (Multimedia: text & speech) made or did not make learning and improving English writing interesting.

1. Not interesting
2. Fairly interesting
3. Interesting
4. Very interesting
5. Extremely interesting

Q.23 Rate the extent to which reading audio books offline (Multimedia: text & speech) made or did not make learning and improving English writing interesting.

1. Not interesting
2. Fairly interesting

3. Interesting
4. Very interesting
5. Extremely interesting

Questions 24-29 related to Offline Learning Time Range of Exposure

Q.24 How much time did you spend on reading books offline (Mono-medium: text/ speech) per day for learning and improving English writing?

1. 0 hour
2. 1 hour
3. 2 hours
4. 3 hours
5. + 3 hours

Q.25 How much time did you spend on listening to songs offline (Mono-medium: text/ speech) per day for learning and improving English writing?

1. 0 hour
2. 1 hour
3. 2 hours
4. 3 hours
5. + 3 hours

Q.26 How much time did you spend on Video games offline (Mono-medium: text/ speech) per day for learning and improving English writing?

1. 0 hour
2. 1 hour
3. 2 hours
4. 3 hours
5. + 3 hours

Q.27 How much time did you spend on formal schooling offline (Multimedia: text & speech) per day for learning and improving English writing?

1. 0 hour
2. 1 hour
3. 2 hours
4. 3 hours
5. + 3 hours

Q.28 How much time did you spend on watching films offline (Multimedia: text & speech) per day for learning and improving English writing?

1. 0 hour
2. 1 hour
3. 2 hours
4. 3 hours
5. + 3 hours

Q.29 How much time did you spend on reading audio books offline (Multimedia: text & speech) per day for learning and improving English writing?

1. 0 hour
2. 1 hour
3. 2 hours
4. 3 hours
5. + 3 hours

Appendix B

Writing Sample 1. (Before the integration of YouTube)

2019 / 7  
Date / 7  
Page No. :

Dear Omar (3)

an writing this letter because I started to miss you and my other friends. This is going to be my fourth year in India. I remember that the first year was a little bit hard for me and my family member because we arrived to the country in summer. Summer in India is different because it's not just hot but it has a big humidity rate and it was disturbing and till that day I always try to not go outside at a year after another. It's just great to live in India. It also has negative points positively ones.

(2) Bashat

Writing Sample 1. (After the integration of YouTube)

2019 / 2019  
Date / 2019

Bashat bisher

Dear mohammad I appreciate that you agreed on taking care of my home as well as my pet. I chose you specifically because I know that you are very patient and hard working. I'll be returning in two weeks. I gave you my number before. Call me when you need to.

Page No. \_\_\_\_\_  
Date: \_\_\_\_\_

7 / <sup>SP</sup>about the cat, it should  
6 have a bath twice a week. [6]  
5 / Her food schedule is  
6 3 to 4 meals daily. [7]  
6 / If the cat escaped, don't  
7 panic. It will return by  
5 two hours maximum. [9]  
7 / There's nothing to worry [10]  
6 about for the house [11]  
4 the servant will  
5 come daily to clean  
5 the house. The only  
5 thing you should do, is [12]

Page No. \_\_\_\_\_  
Date: \_\_\_\_\_

5 water the plants twice  
2 a day. [12]

Writing Sample 2. (Before the integration of YouTube)

Kahya omar  
2019/1/7

Dear Ali,

Hi Ali, I'm your old friend, did you remember me. I want to tell you about that I live in. It's India. India is a good country, but the only thing that make it not very good is it has a large population. That is make it really bad. It's second country that it has a big population in the world with a 500,000,000 person.

And in summer it's always be rainy with a huge humidity. In winter India always has a huge plution. It's arrive to 400% regularly. about living here it's good, but you have to work of corror and they give only a 100 \$ dolar per month for mostly jobs, are there. And it has a good economy as well with good industry. That is evry thing that I know about India. I hope you enjoy.

Writing Sample 2. (After the integration of YouTube)

Yahya omer

Dear Abdulrah,  
Hello my friend Abdulrah! how are you? I hope you are fine. You just agreed to take care of my house and thank you so much and I appreciate it. about the house cleaning, do not take any care about it because I brought a servant to take care about how to clean the house. That was first. Second, I want you to take care about the house if any one wants to

steal it. Third, I want you to take care about the plants that it is in the garden. Just water it. Finally, I gave you the key of my car, so you can use it to go out and take care about it as well. This is my watsup number if any thing happened 8871345 and thank you again!
